# Supplementary material for: Flower-like Thiourea–Formaldehyde Resin Microspheres for the Adsorption of Silver Ions
Source: MDPI journal article supplement (doi:10.3390/polym15112423), 2023-05-23
Supplement: s1 [file s1]

## Article

# Flower-Like Thiourea–Formaldehyde Resin Microspheres for the Adsorption of Silver Ions

Yuhan Li <sup>1,†</sup>, Xiaoli Wang <sup>2,†</sup>, Jing Xia <sup>3</sup>, Guangwei Zhou <sup>1</sup>, Xiaomu Wang <sup>1</sup>, Dingxuan Wang <sup>1</sup>, Junying Zhang <sup>1</sup>, Jue Cheng <sup>1,\*</sup> and Feng Gao <sup>1,\*</sup>

<sup>1</sup> Key Laboratory of Carbon Fiber and Functional Polymers, Ministry of Education, Beijing University of Chemical Technology, Beijing 100029, China; chn\_liyh@163.com (Y.L.); zgwbuct@163.com (G.Z.); w343002449@163.com (X.W.); wangdx\_2022@163.com (D.W.); zhangjy@mail.buct.edu.cn (J.Z.)

<sup>2</sup> Aerospace Research Institute of Materials & Processing Technology, Beijing 100076, China; wangxiaoli@arimt.com

<sup>3</sup> Ansteel Beijing Research Institute Co., Ltd., Beijing 102200, China; xiaj0001@126.com

\* Correspondence: chengjue@mail.buct.edu.cn (J.C.); gaofeng@mail.buct.edu.cn (F.G.); Tel./Fax: +86-10-6442-5439 (J.C. & F.G.)

† These authors contributed equally to this work.

**Citation:** Li, Y.; Wang, X.; Xia, J.; Zhou, G.; Wang, X.; Wang, D.; Zhang, J.; Cheng, J.; Gao, F. Flower-Like Thiourea–Formaldehyde Resin Microspheres for the Adsorption of Silver Ions. *Polymers* **2023**, *15*, 2423. <https://doi.org/10.3390/polym15112423>

Academic Editors: Xin Zhou, Wei Zhang, Peng Zhang, Bin Ji and Shujuan Meng

Received: 26 April 2023

Revised: 14 May 2023

Accepted: 17 May 2023

Published: 23 May 2023

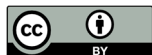

**Copyright:** © 2023 by the authors. Licensee MDPI, Basel, Switzerland. This article is an open access article distributed under the terms and conditions of the Creative Commons Attribution (CC BY) license (<https://creativecommons.org/licenses/by/4.0/>).

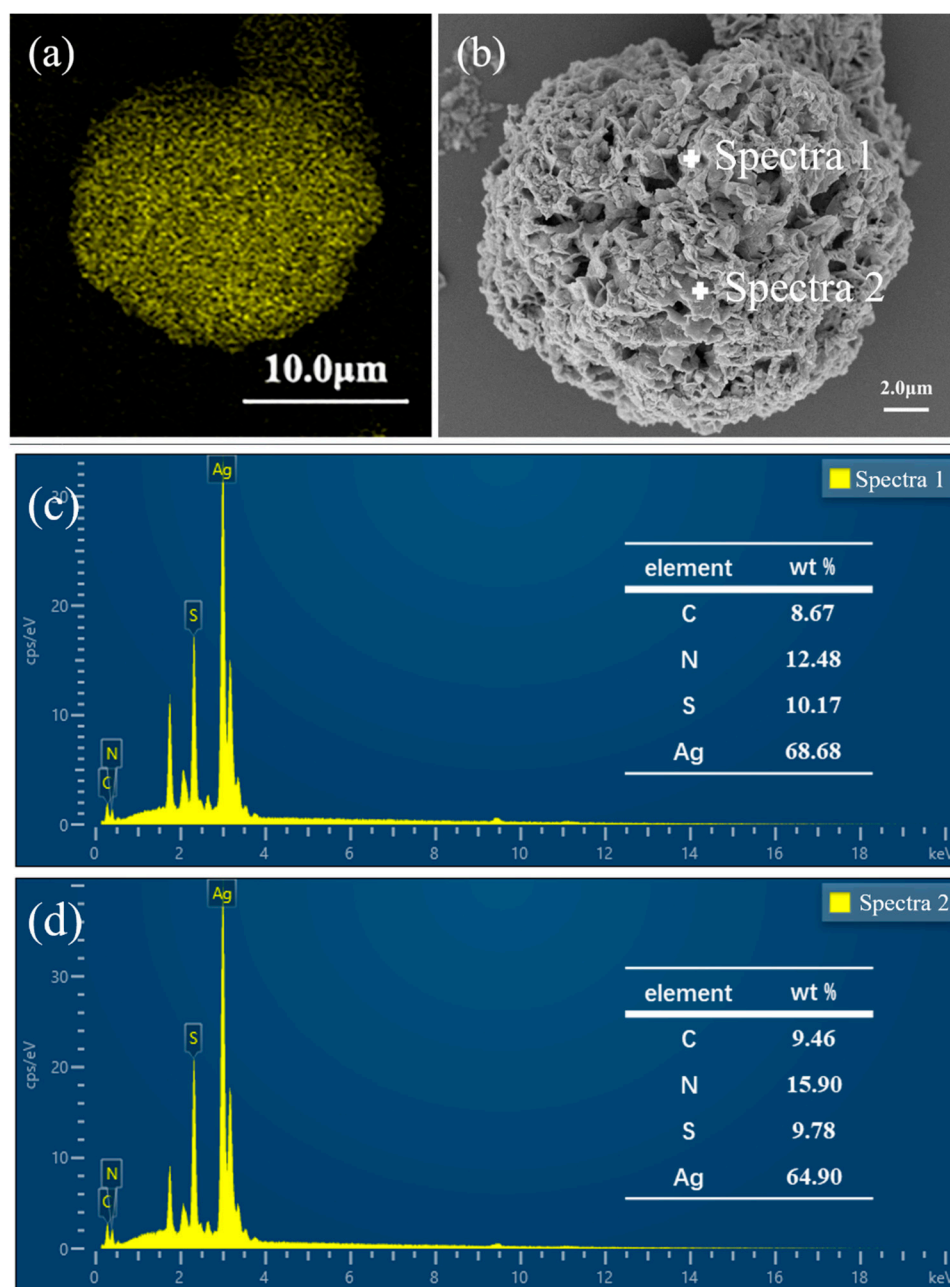

**Figure S1.** (a) The EDAX for silver ions distribution on FTFM surface. (b) two points on the FTFM surface for element mapping. (c,d) Elemental content of two points.

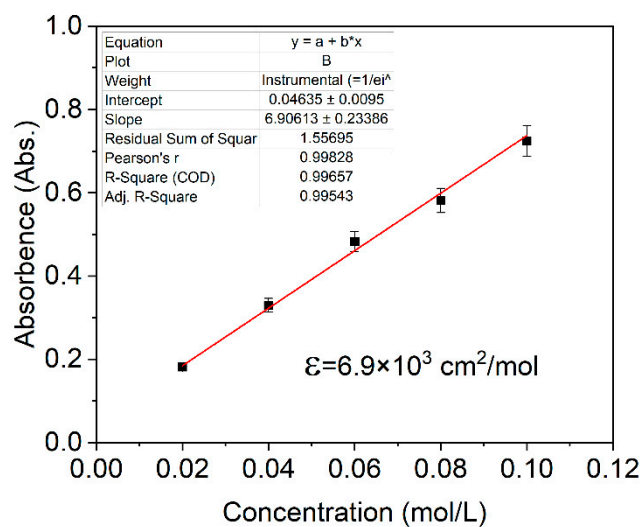

**Figure S2.** The calculation of the UV extinction coefficient of silver.

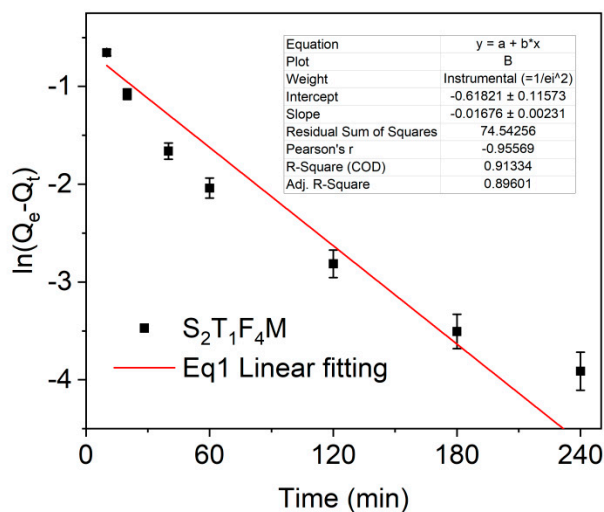

**Figure S3.** linear fitting between  $\ln(Q_e - Q_t)$  and adsorption time of  $S_2T_1F_4M$  according to Equation (1) (main text).

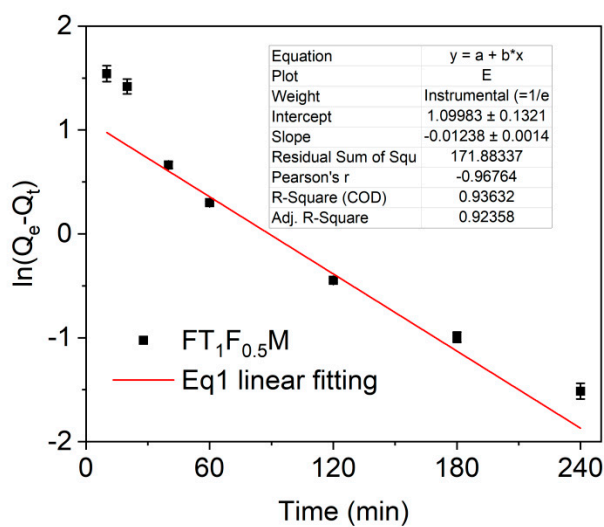

**Figure S4.** linear fitting between  $\ln(Q_e - Q_t)$  and adsorption time of FT<sub>1</sub>F<sub>0.5</sub>M according to Equation (1) (main text).

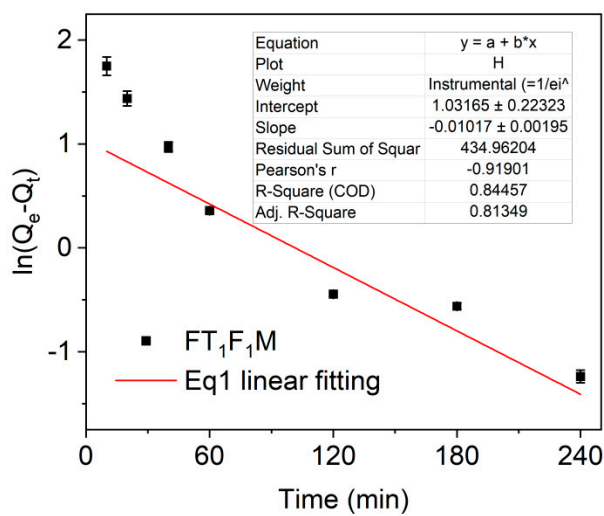

**Figure S5.** linear fitting between  $\ln(Q_e - Q_t)$  and adsorption time of FT<sub>1</sub>F<sub>1</sub>M according to Equation (1) (main text).

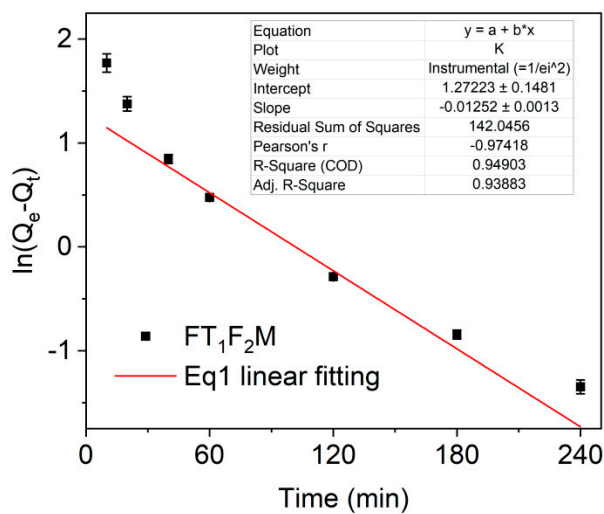

**Figure S6.** linear fitting between  $\ln(Q_e - Q_t)$  and adsorption time of FT<sub>1</sub>F<sub>2</sub>M according to Equation (1) (main text).

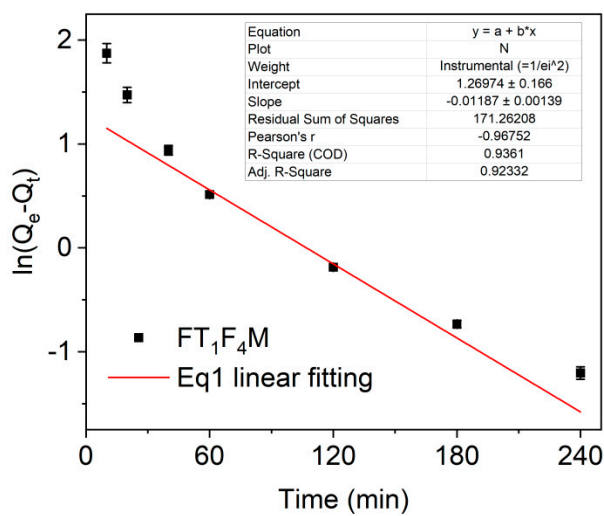

**Figure S7.** linear fitting between  $\ln(Q_e - Q_t)$  and adsorption time of FT<sub>1</sub>F<sub>4</sub>M according to Equation (1) (main text).

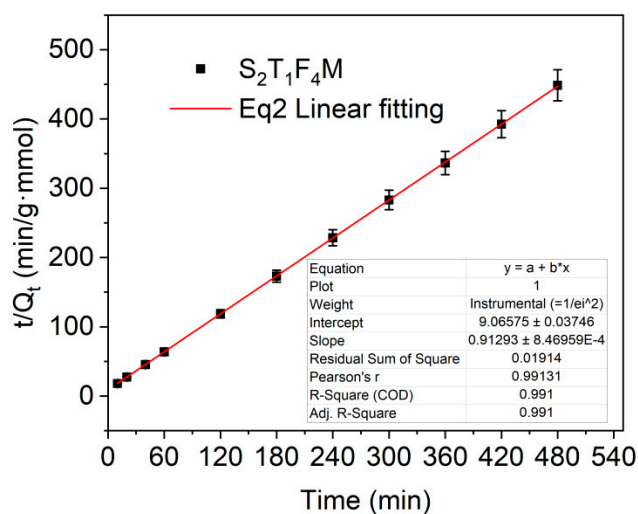

**Figure S8.** linear fitting between  $t/Q_t$  and adsorption time of  $S_2T_1F_4M$  according to Equation (2) (main text).

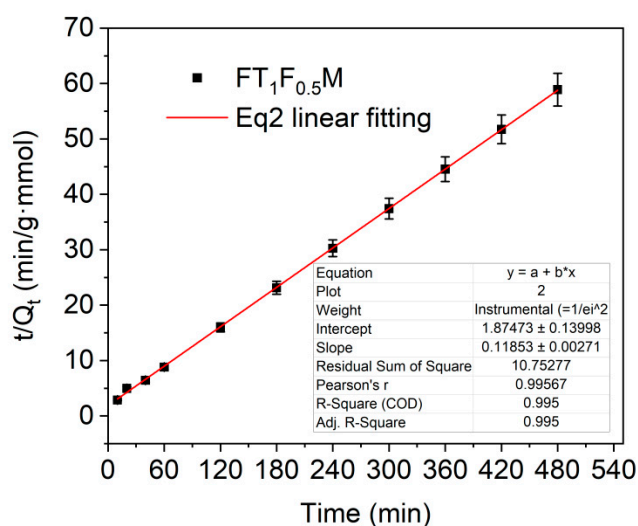

**Figure S9.** linear fitting between  $t/Q_t$  and adsorption time of  $FT_1F_{0.5}M$  according to Equation (2) (main text).

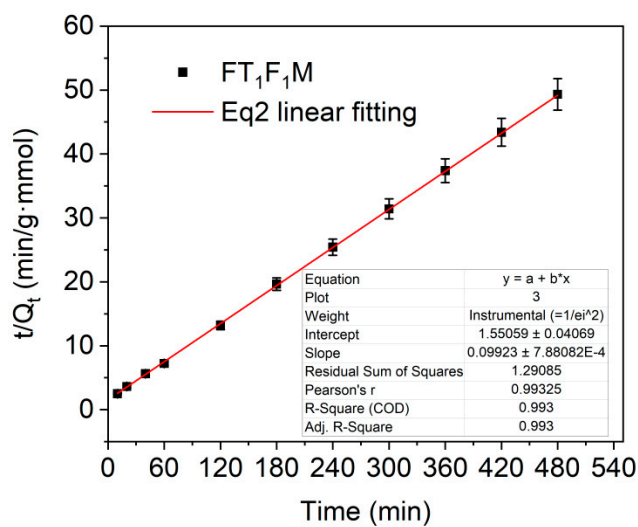

**Figure S10.** linear fitting between  $t/Q_t$  and adsorption time of  $FT_1F_1M$  according to Equation (2) (main text).

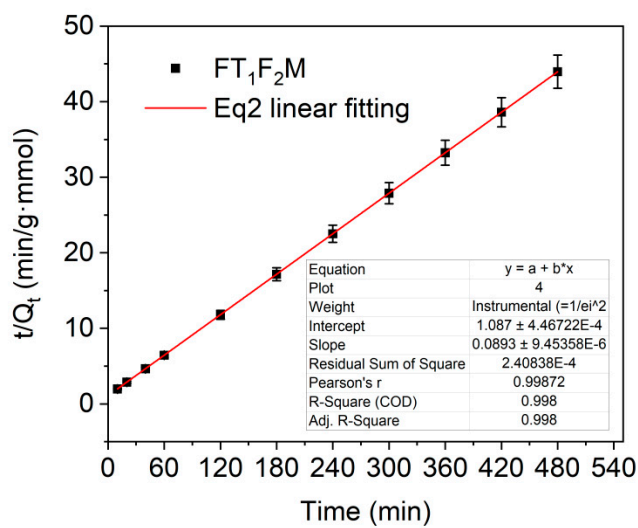

**Figure S11.** linear fitting between  $t/Q_t$  and adsorption time of  $FT_1F_2M$  according to Equation (2) (main text).

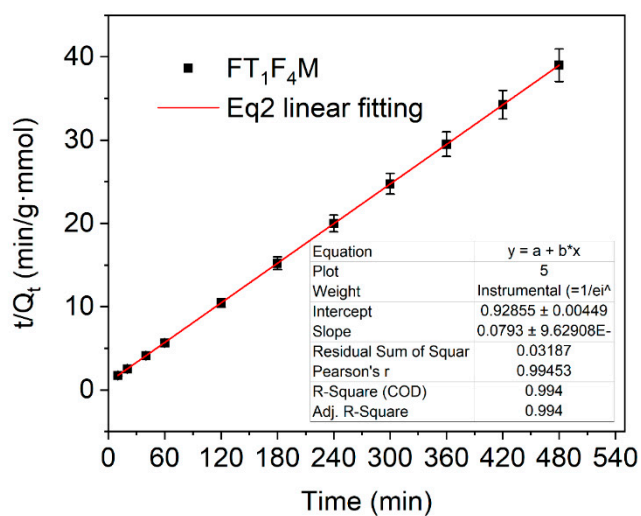

**Figure S12.** linear fitting between  $t/Q_t$  and adsorption time of  $FT_1F_4M$  according to Equation (2) (main text).

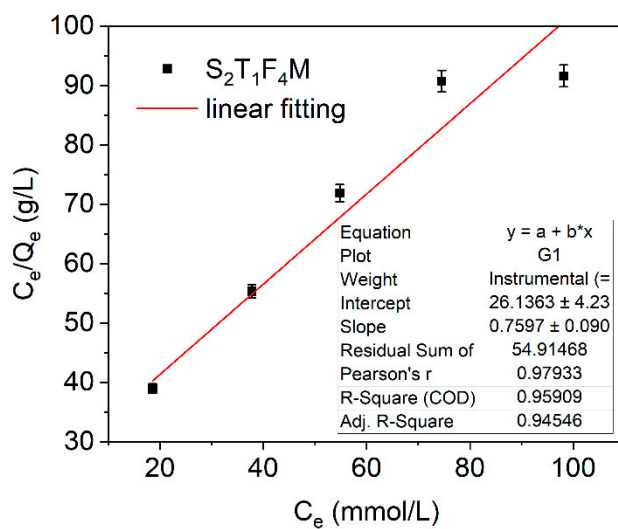

**Figure S13.** linear fitting between  $C_e/Q_e$  and  $C_e$  of  $S_2T_1F_4M$  according to Equation (5) (main text).

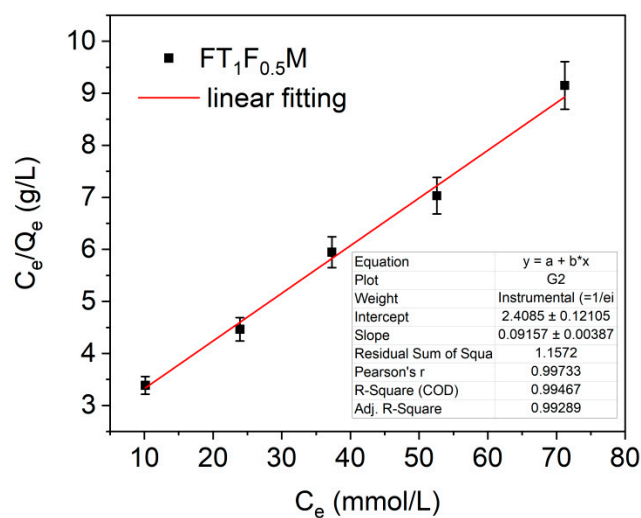

Figure S14. linear fitting between  $C_e/Q_e$  and  $C_e$  of  $FT_1F_{0.5}M$  according to Equation (5) (main text).

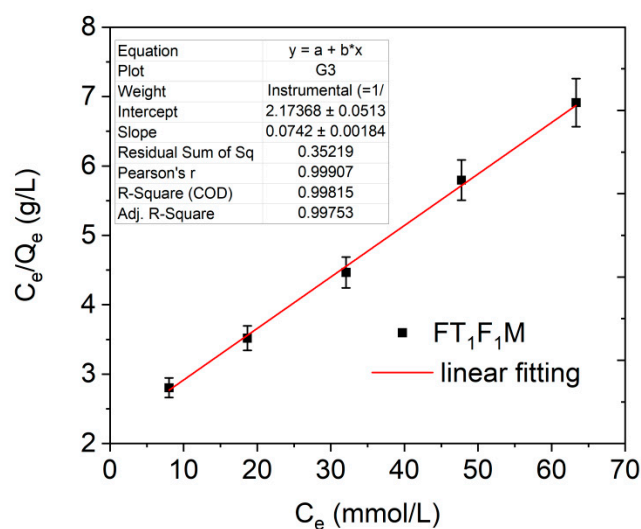

Figure S15. linear fitting between  $C_e/Q_e$  and  $C_e$  of  $FT_1F_1M$  according to Equation (5) (main text).

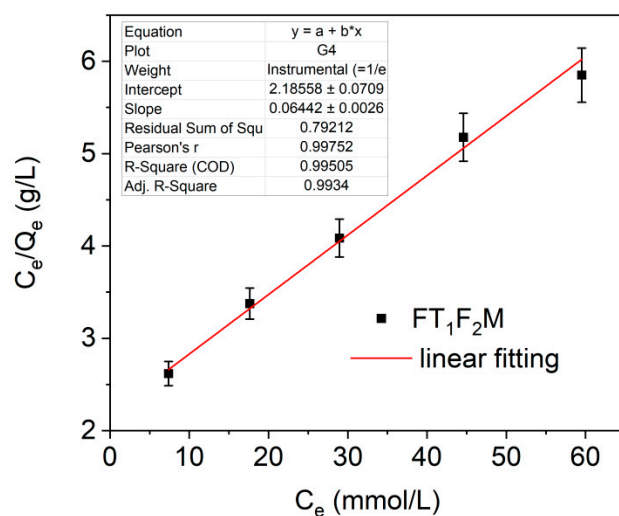

Figure S16. linear fitting between  $C_e/Q_e$  and  $C_e$  of FT<sub>1</sub>F<sub>2</sub>M according to Equation (5) (main text).

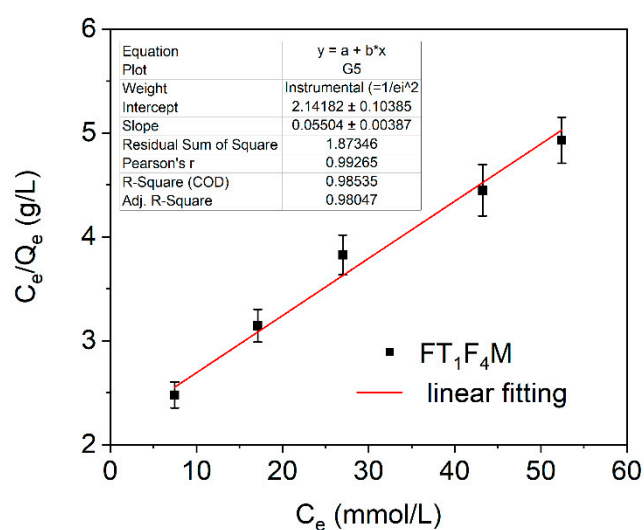

Figure S17. linear fitting between  $C_e/Q_e$  and  $C_e$  of FT<sub>1</sub>F<sub>4</sub>M according to Equation (5) (main text).

Table S1. Maximum adsorption capacities for adsorption of Ag<sup>+</sup> onto various adsorbents.

| Absorbent                                            | Adsorption capacity<br>(mmol/g) |
|------------------------------------------------------|---------------------------------|
| Thiourea-modified chitosan resin                     | 3.770[1]                        |
| zeolitic material from green tuff stone cake         | 1.100[2]                        |
| Halloysite nanotubes                                 | 1.018[3]                        |
| Sulfoethyl functionalized silica nanoparticle        | 0.203[4]                        |
| Flowerlike thiourea formaldehyde resin micro-spheres | 18.17                           |

## References

1. Wang, L.; Xing, R.; Liu, S.; Yu, H.; Qin, Y.; Li, K.; Feng, J.; Li, R.; Li, P. Recovery of Silver (I) Using a Thiourea-Modified Chitosan Resin. *J. Hazard. Mater.* **2010**, *180*, 577–582. <https://doi.org/10.1016/j.jhazmat.2010.04.072>
2. Wajima, T. Synthesis of Zeolitic Material from Green Tuff Stone Cake and Its Adsorption Properties of Silver (I) from Aqueous Solution. *Microporous Mesoporous Mater.* **2016**, *233*, 154–162. <https://doi.org/10.1016/j.micromeso.2016.01.020>
3. Kiani, G. High Removal Capacity of Silver Ions from Aqueous Solution onto Halloysite Nanotubes. *Appl. Clay Sci.* **2014**, *90*, 159–164. <https://doi.org/10.1016/j.clay.2014.01.010>
4. Zhang, L.; Zhang, G.; Wang, S.; Peng, J.; Cui, W. Sulfoethyl Functionalized Silica Nanoparticle as an Adsorbent to Selectively Adsorb Silver Ions from Aqueous Solutions. *J. Taiwan Inst. Chem. Eng.* **2017**, *71*, 330–337. <https://doi.org/10.1016/j.jtice.2017.01.001>

**Disclaimer/Publisher's Note:** The statements, opinions and data contained in all publications are solely those of the individual author(s) and contributor(s) and not of MDPI and/or the editor(s). MDPI and/or the editor(s) disclaim responsibility for any injury to people or property resulting from any ideas, methods, instructions or products referred to in the content.
